# Supplementary material for: High-quality WS2 film as a hole transport layer in high-efficiency non-fullerene organic solar cells
Source: Royal Society of Chemistry journal article supplement (doi:10.1039/d1nr03728e), 2021-01-01
Supplement: d1nr03728e1.pdf [file d1nr03728e1.pdf]

## Electronic Supplementary Information

### High-quality WS<sub>2</sub> film formed on pristine ITO as Hole Transport Layer Film in high-efficiency Non-fullerene Solar Cells

Xiaojing Wang,<sup>‡a</sup> Peng Liu,<sup>‡a</sup> Boonkar Yap,<sup>b</sup> Zhicai He,<sup>\*a</sup> Ruidong Xia<sup>b</sup> and Wai-Yeung Wong<sup>c</sup>

<sup>[a]</sup> State Key Laboratory of Luminescent Materials and Devices, Institute of Polymer Optoelectronic Materials and Devices, South China University of Technology, Guangzhou, Guangdong, 510640, China.

\*E-mail: zhicaihe@scut.edu.cn

<sup>[b]</sup> The International School of Advanced Materials, School of Material Science and Engineering, South China University of Technology, Guangzhou, Guangdong, 510640, China.

<sup>[c]</sup> Department of Applied Biology and Chemical Technology, The Hong Kong Polytechnic University (PolyU), Hung Hom, Hong Kong, 999077, China.

<sup>[‡]</sup> These authors contributed equally to this work.

# 1. Supporting Tables

**Table S1.** The carrier mobility measurement in PM6: Y6 OSCs with different HTLs.

| Device structure                                                    | $\mu_h$ (cm <sup>2</sup> V <sup>-1</sup> s <sup>-1</sup> ) | $\mu_e$ (cm <sup>2</sup> V <sup>-1</sup> s <sup>-1</sup> ) |
|---------------------------------------------------------------------|------------------------------------------------------------|------------------------------------------------------------|
| ITO <sub>plasma</sub> /WS <sub>2</sub> /PM6:Y6/MoO <sub>3</sub> /Ag | 3.46×10 <sup>-4</sup>                                      | —                                                          |
| ITO/WS <sub>2</sub> /PM6:Y6/MoO <sub>3</sub> /Ag                    | 1.97×10 <sup>-3</sup>                                      | —                                                          |
| ITO/PEDOT: PSS/PM6:Y6/MoO <sub>3</sub> /Ag                          | 8.02×10 <sup>-4</sup>                                      | —                                                          |
| ITO/ZnO/PM6:Y6/PFN-Br/Ag                                            | —                                                          | 8.89 × 10 <sup>-4</sup>                                    |

**Table S2.** The carrier combination lifetime and carrier extraction time fitted from TPV and TPC curves.

| Anode/HTL                              | $\tau$ (us) <sup>a</sup> | $\tau$ (us) <sup>b</sup> |
|----------------------------------------|--------------------------|--------------------------|
| ITO <sub>plasma</sub> /WS <sub>2</sub> | 1.03                     | 0.74                     |
| ITO/WS <sub>2</sub>                    | 3.95                     | 0.65                     |
| ITO <sub>plasma</sub> /PEDOT:PSS       | 3.56                     | 0.64                     |

<sup>a</sup> carrier combination lifetime

<sup>b</sup> carrier extraction time

**Table S3.** The calculation result of <N> values form UV-Vis spectroscopy.

| Sample          | Initial concentration (mg/mL) | Sonic processing time (h) | A-exction position (nm) | Thickness <N> |
|-----------------|-------------------------------|---------------------------|-------------------------|---------------|
| WS <sub>2</sub> | 6                             | 6                         | 622                     | 3.51          |
|                 |                               | 9                         | 617                     | 1.95          |
|                 |                               | 12                        | 614                     | 1.37          |

**Note:**The mean layer number of WS<sub>2</sub> nanosheets exfoliated in initial 6mg/mL solution with a range of sonic processing time from 6 to 12 h were estimated using the following equation:<sup>1</sup>

$$<N> = 6.35 \times 10^{-32} e^{\lambda_A(nm)/8.51}$$

## 2. Supporting Figures

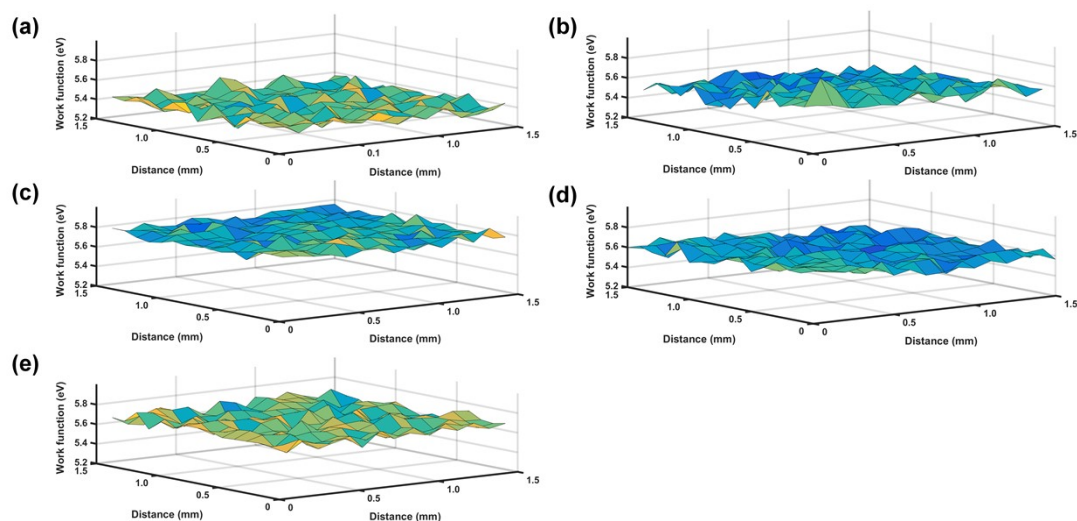

**Figure S1.** The scanning kelvin probe measurement (SKPM) of WS<sub>2</sub> films as HTLs preparing by different processing conditions. The initial concentration of WS<sub>2</sub> is 6 mg/mL, and (a), (b), (c) represents 6, 9, 12 h sonic processing time, respectively. The sonic processing time is 9 h, and (d), (e) represents 10 mg/mL, 14 mg/mL initial concentration of WS<sub>2</sub>, respectively.

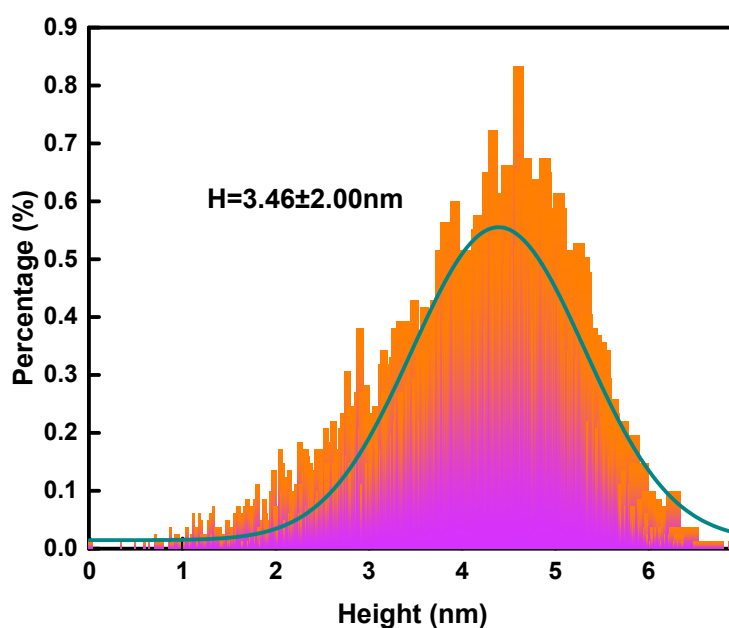

**Figure S2.** The percentage histogram of height of WS<sub>2</sub> nanosheet (Figure 6a), fitted by Gaussian distribution.

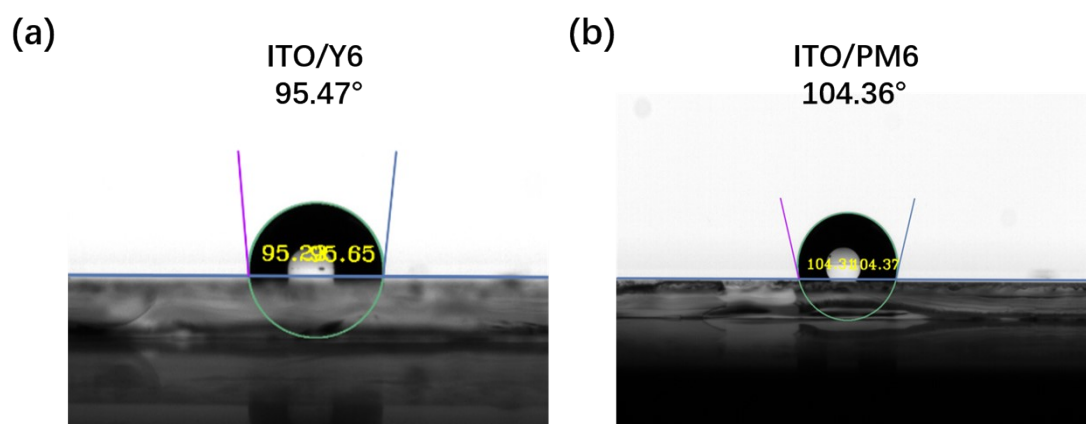

**Figure S3.** The water contact angle on the surface of ITO/ Y6 film (a) and ITO/PM6 film (b).

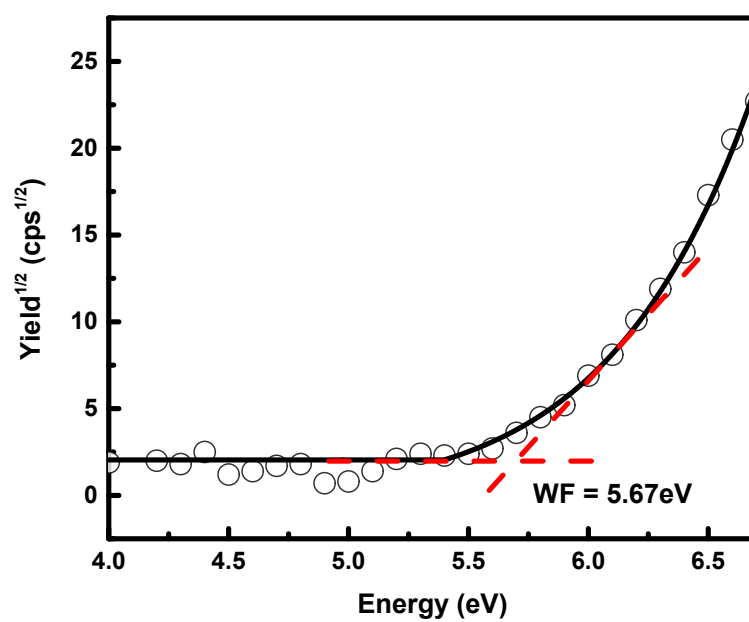

**Figure S4.** The ultraviolet photoelectron spectroscopy (UPS) measurement of WS<sub>2</sub> film.

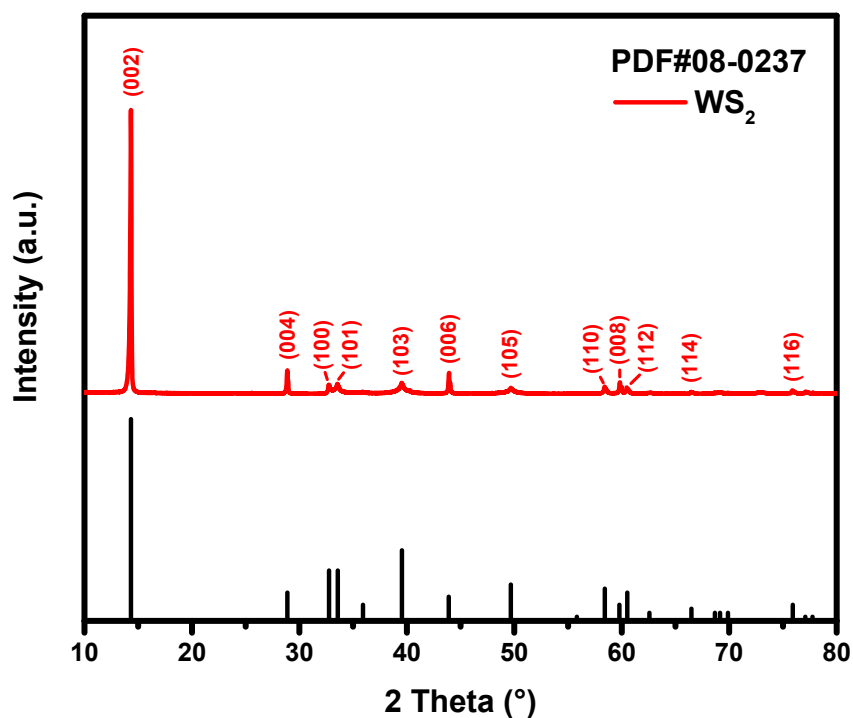

**Figure S5.** The X-ray diffraction (XRD) pattern of the WS<sub>2</sub> powder.

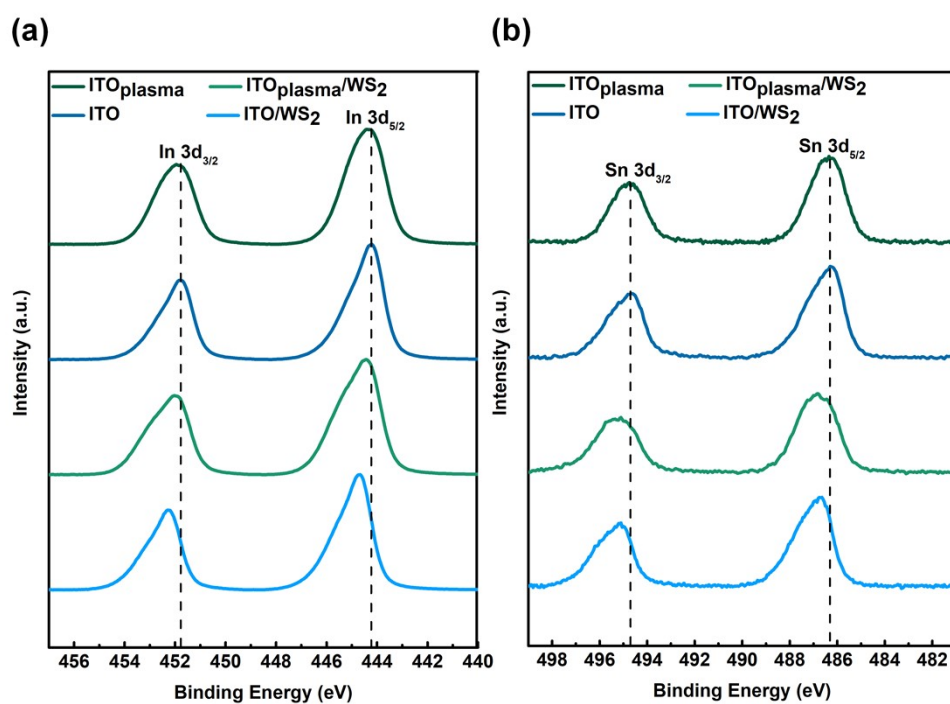

**Figure S6.** The XPS spectra of (a) In 3d, (b) Sn 3d of ITO nanoparticles.

**Note:** We have performed XPS test (shown in Figure S6) to elucidate the influence of the plasma treatment of ITO on the deposition of WS<sub>2</sub>. For the ITO nanoparticles, the binding energies (BEs) of a photoelectron in In 3d<sub>5/2</sub>, In 3d<sub>3/2</sub>, Sn 3d<sub>5/2</sub>, and Sn 3d<sub>3/2</sub> are determined to be 444.1, 451.7, 486.3 and 494.7 eV, respectively.<sup>2</sup> This is consistent with our results shown in Figure S6. When WS<sub>2</sub> film is spin-coated on pristine ITO without plasma, the BEs of In 3d<sub>5/2</sub>, In 3d<sub>3/2</sub>, Sn 3d<sub>5/2</sub>, and Sn 3d<sub>3/2</sub> shift upwards about 0.5eV, possibly caused by W or S bonding with Dangling bonds of In and Sn resulted from the oxygen vacancies in ITO.<sup>3</sup> In the case of WS<sub>2</sub> film spin-coated on plasma-treated ITO, the BEs shift of In 3d<sub>5/2</sub> and In 3d<sub>3/2</sub> can be ignored, indicating less W or S bonds with In due to the disappear of Dangling bonds by plasma filling oxygen vacancies of ITO. Therefore, stronger chemisorption is formed between WS<sub>2</sub> and pristine ITO than plasma-treated ITO, thus influencing the deposition behavior of WS<sub>2</sub>.

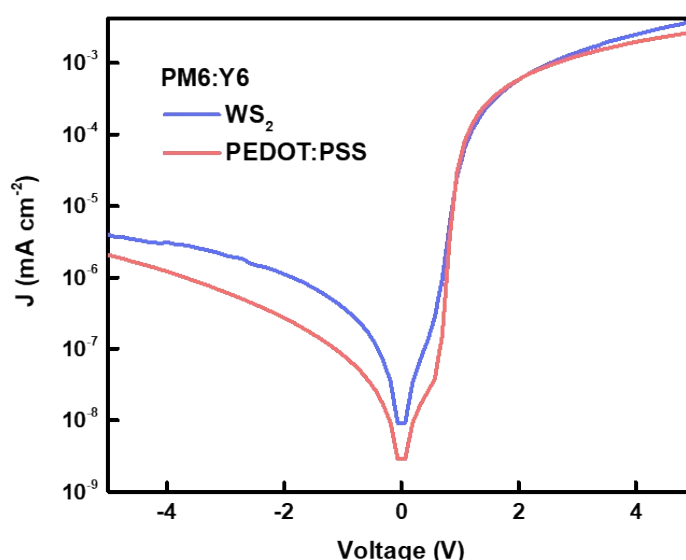

**Figure S7.** The dark J-V curves of the OSCs with WS<sub>2</sub> and PEDOT: PSS as HTLs.

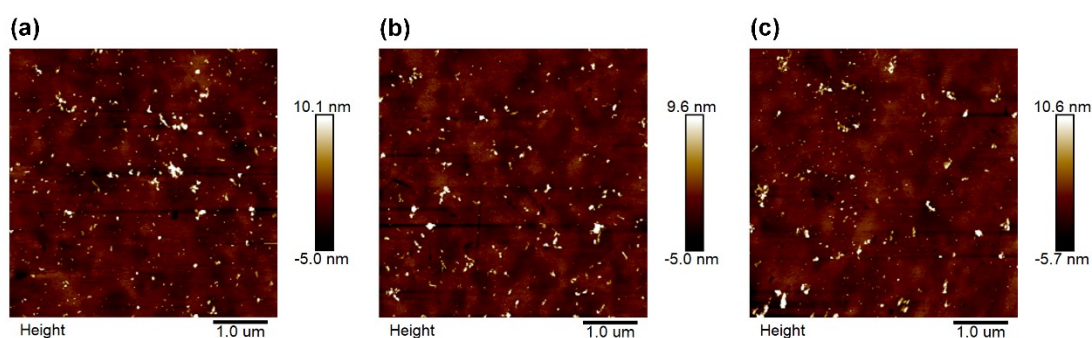

**Figure S8.** AFM images of WS<sub>2</sub> nanosheets exfoliated in 6mg/mL initial solution with 6h, 9h, 12h sonic processing time (a, b, c), respectively.

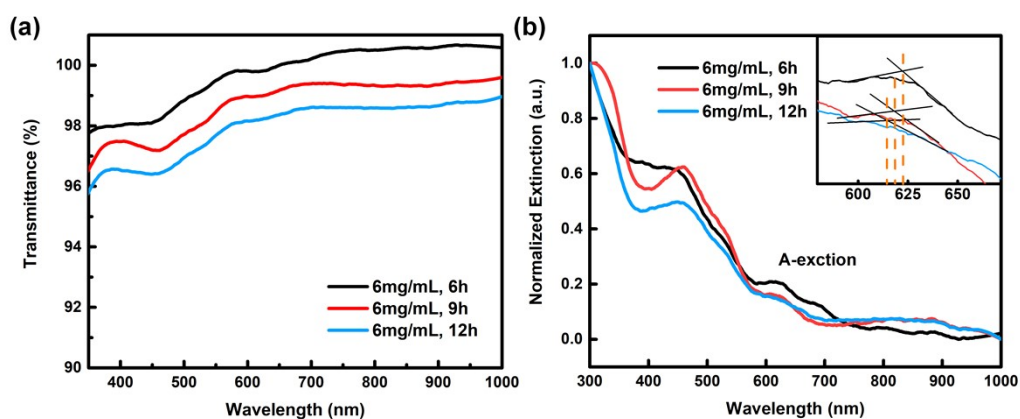

**Figure S9.** (a) Transmittance spectra of WS<sub>2</sub> nanosheets exfoliated in initial 6 mg/mL solution with a range of sonic processing time from 6 to 12 h. (b) Optical extinction spectra of WS<sub>2</sub> nanosheets exfoliated in initial 6 mg/mL solution with a range of sonic processing time from 6 to 12 h. The spectra normalized to the extinction value at 300 nm and the inset shows the magnified view of the A-exciton region.

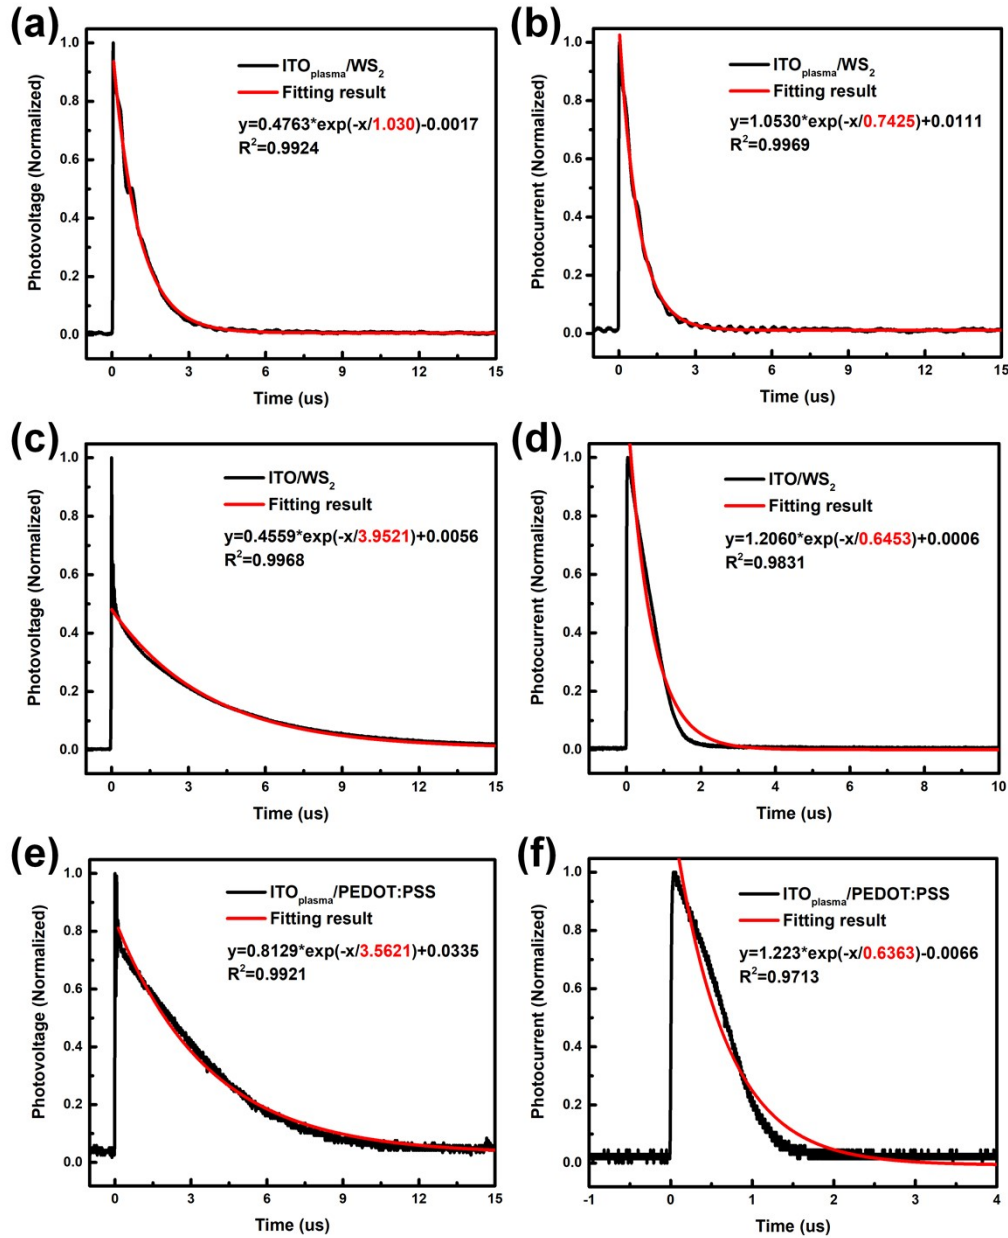

**Figure S10.** The measurement data (black lines) and fitting results (red lines) of TPV (a, c, e) and TPC (b, d, f) of devices based on three modified anodes: ITO<sub>plasma</sub>/WS<sub>2</sub>, ITO/WS<sub>2</sub>, and ITO<sub>plasma</sub>/PEDOT: PSS.

### 3. Supplementary Methods

#### Calculation methods of carrier combination lifetime and carrier extraction time from TPV and TPC:<sup>4</sup>

For the Transient Photovoltage (TPV) measurements, a weakened 620 nm laser pulse with a pulse width of 120 fs was used as the light source, which makes the device produce a small transient voltage on the basis of the steady voltage. The

measuring equipment was linked to a Tektronix TDS 3052C digitizing oscilloscope in the open-circuit conditions. After filtering the DC signal, we can get the transient photovoltage signal, which is a single exponential decay curve. The decay life can be obtained by exponential fitting with the exponential decay formula as following:

$$V = V_0 \exp\left(-\frac{t}{\tau}\right)$$

Also, we can obtain the transient photocurrent (TPC) signal and the carrier extraction time can be obtained by exponential fitting with the exponential decay formula as following:

$$I(t) = I_0 \exp\left(-\frac{t}{\tau}\right)$$

#### **Calculation methods of carrier mobility:**

The carrier mobility of the hole-only devices (electron-only devices) was extracted by fitting the voltage via the space charge limited current (SCLC) Mott-Gurney equation as follows:

$$J = 9\epsilon_r\epsilon_0\mu V^2/8d^3$$

where  $\epsilon_r$  is the relative dielectric constant,  $\epsilon_0$  is the permittivity of vacuum,  $d$  is the thickness of the active layer,  $\mu_e$  ( $\mu_p$ ) is the electron (hole) mobility.<sup>5</sup>

#### **Contact angle measurements:**

The contact angle tests were performed on DSA-x plus optical contact angle analyzer. The surface energy of the materials was characterized and calculated by the contact angles of the two probe liquids with the Owens and Wendt equation:<sup>6</sup>

$$(1 + \cos \theta)\gamma_{pl} = 2(\gamma_s^d \gamma_{pl}^d)^{1/2} + 2(\gamma_s^p \gamma_{pl}^p)^{1/2}$$

where  $\gamma_s$  and  $\gamma_{pl}$  are the surface energy of the sample and the probe liquid,

respectively. The superscripts  $d$  and  $p$  refer to the dispersion and polar components of the surface energy, respectively.

## References

- <sup>1</sup> C. Backes, B. M. Szydłowska, A. Harvey, S. Yuan, V. Vega-Mayoral, B. R. Davies, P.-I. Zhao, D. Hanlon, E. J. G. Santos, M. I. Katsnelson, W. J. Blau, C. Gadermaier and J. N. Coleman, *ACS Nano*, 2016, **10**, 1589-1601.
- <sup>2</sup> S.-N. Kim, S.-B. Kim and H.-C. Choi, *Bulletin of the Korean Chemical Society*, 2012, **33**, 194-198.
- <sup>3</sup> M. Timpel, H. Li, M. V. Nardi, B. Wegner, J. Frisch, P. J. Hotchkiss, S. R. Marder, S. Barlow, J. L. Brédas and N. Koch, *Advanced Functional Materials* 2018, **28**, 1704438.
- <sup>4</sup> C.G. Shuttle, B. O'Regan, A.M. Ballantyne, J. Nelson, D.D.C. Bradley, J.D. Mello, J. R. Durrant, *Appl. Phys. Lett.*, 2008, **92**, 093311.
- <sup>5</sup> I. Zonno, A. Martinez-Otero, J.-C. Hebig and T. Kirchartz, *Physical Review Applied*, 2017, **7**, 034018.
- <sup>6</sup> X. Liu, C.H. Zhang, C. H. Duan, M. M. Li, Z. C. Hu, J. Wang, F. Liu, N. Li, C. J. Brabec, R. A. J. Janssen, G. C. Bazan, F. Huang, and Y. Cao, *J. Am. Chem. Soc.*, 2018, **140**, 8934–8943.
